# Supplementary material
Source: MDPI journal article supplement (https://www.mdpi.com/2071-1050/15/1/293)
Supplement: s1 [file s1]

# Supplementary Table

**Table S1:** Agronomic parameters of the 20 wheat lines. Letters in the superscripts indicate significant variation among lines.

| Genotypes   | Days to heading             | days to maturity            | plant height (cm)          | spikelets per spike       | single spike wt (g)      | grain wt per spike        | 100 grain wt              |
|-------------|-----------------------------|-----------------------------|----------------------------|---------------------------|--------------------------|---------------------------|---------------------------|
| Markaz-19   | 125.3 ± 4.0 <sup>cd</sup>   | 182.3 ± 5.1 <sup>d</sup>    | 120.0 ± 14.8 <sup>ab</sup> | 30.9 ± 3.4 <sup>de</sup>  | 57.7 ± 8.1 <sup>a</sup>  | 4.5 ± 0.1 <sup>d</sup>    | 7.8 ± 1.3 <sup>cd</sup>   |
| Borloaug-16 | 128.3 ± 2.5 <sup>d</sup>    | 182.0 ± 4.6 <sup>cd</sup>   | 119.7 ± 6.8 <sup>ab</sup>  | 31.9 ± 1.5 <sup>e</sup>   | 53.3 ± 11.1 <sup>a</sup> | 4.0 ± 0.5 <sup>bcd</sup>  | 7.9 ± 0.6 <sup>cd</sup>   |
| Zincol-16   | 124.3 ± 3.1 <sup>bcd</sup>  | 180.7 ± 1.2 <sup>cd</sup>   | 122.3 ± 2.5 <sup>b</sup>   | 29.2 ± 2.0 <sup>cde</sup> | 51.2 ± 11.5 <sup>a</sup> | 4.3 ± 0.5 <sup>cd</sup>   | 8.4 ± 0.8 <sup>d</sup>    |
| Pakistan-13 | 123.7 ± 5.1 <sup>bcd</sup>  | 181.0 ± 1.0 <sup>cd</sup>   | 120.0 ± 1.7 <sup>ab</sup>  | 28.2 ± 1.3 <sup>cde</sup> | 50.3 ± 11.9 <sup>a</sup> | 4.0 ± 1.0 <sup>cd</sup>   | 7.6 ± 0.7 <sup>abcd</sup> |
| NARC-11     | 124.3 ± 2.5 <sup>bcd</sup>  | 180.7 ± 1.2 <sup>cd</sup>   | 116.3 ± 4.0 <sup>ab</sup>  | 28.2 ± 1.3 <sup>cde</sup> | 43.6 ± 18.3 <sup>a</sup> | 3.7 ± 0.8 <sup>abcd</sup> | 6.9 ± 0.8 <sup>abcd</sup> |
| NARC-09     | 126.0 ± 2.0 <sup>cd</sup>   | 180.3 ± 1.5 <sup>cd</sup>   | 114.7 ± 6.8 <sup>ab</sup>  | 28.1 ± 1.2 <sup>cde</sup> | 44.7 ± 16.3 <sup>a</sup> | 3.4 ± 0.5 <sup>abcd</sup> | 8.1 ± 0.8 <sup>cd</sup>   |
| Wafaq-01    | 126.0 ± 1.7 <sup>cd</sup>   | 180.0 ± 1.0 <sup>cd</sup>   | 116.7 ± 2.1 <sup>ab</sup>  | 27.0 ± 1.0 <sup>cd</sup>  | 42.4 ± 17.1 <sup>a</sup> | 3.4 ± 0.5 <sup>abcd</sup> | 7.1 ± 0.1 <sup>abcd</sup> |
| Magalla-99  | 125.0 ± 1.0 <sup>bcd</sup>  | 180.3 ± 2.5 <sup>cd</sup>   | 114.3 ± 1.5 <sup>ab</sup>  | 26.9 ± 0.8 <sup>c</sup>   | 41.9 ± 17.0 <sup>a</sup> | 3.7 ± 0.0 <sup>abcd</sup> | 7.7 ± 0.6 <sup>bcd</sup>  |
| Attahabib   | 122.3 ± 4.7 <sup>bcd</sup>  | 179.3 ± 1.2 <sup>cd</sup>   | 110.7 ± 6.8 <sup>ab</sup>  | 26.1 ± 1.2 <sup>c</sup>   | 47.7 ± 21.1 <sup>a</sup> | 3.4 ± 0.5 <sup>abcd</sup> | 7.2 ± 0.4 <sup>abcd</sup> |
| Khatakwai   | 123.7 ± 1.2 <sup>bcd</sup>  | 178.3 ± 2.1 <sup>bcd</sup>  | 114.3 ± 1.5 <sup>ab</sup>  | 26.1 ± 1.2 <sup>c</sup>   | 50.0 ± 12.3 <sup>a</sup> | 3.3 ± 0.5 <sup>abcd</sup> | 7.1 ± 0.3 <sup>abcd</sup> |
| Janbaza     | 121.3 ± 2.1 <sup>abcd</sup> | 176.7 ± 1.5 <sup>bcd</sup>  | 111.7 ± 2.1 <sup>ab</sup>  | 25.6 ± 0.7 <sup>bc</sup>  | 45.1 ± 12.5 <sup>a</sup> | 3.7 ± 0.1 <sup>abcd</sup> | 7.0 ± 0.2 <sup>abcd</sup> |
| Lalma-13    | 120.7 ± 2.5 <sup>abcd</sup> | 176.7 ± 1.2 <sup>bcd</sup>  | 111.3 ± 2.5 <sup>ab</sup>  | 24.8 ± 0.7 <sup>ab</sup>  | 41.2 ± 16.9 <sup>a</sup> | 3.2 ± 0.2 <sup>abcd</sup> | 7.3 ± 0.8 <sup>abcd</sup> |
| Tatara-96   | 121.7 ± 1.2 <sup>abcd</sup> | 176.7 ± 2.9 <sup>bcd</sup>  | 111.3 ± 2.5 <sup>ab</sup>  | 24.0 ± 1.0 <sup>ab</sup>  | 39.1 ± 13.3 <sup>a</sup> | 3.3 ± 0.3 <sup>abcd</sup> | 6.8 ± 0.5 <sup>abcd</sup> |
| Panjab-11   | 121.7 ± 2.9 <sup>abcd</sup> | 176.0 ± 2.6 <sup>abcd</sup> | 109.7 ± 5.1 <sup>ab</sup>  | 23.8 ± 1.1 <sup>ab</sup>  | 37.4 ± 12.4 <sup>a</sup> | 3.3 ± 0.1 <sup>abcd</sup> | 6.8 ± 0.7 <sup>abcd</sup> |
| Pirsabaq-05 | 118.7 ± 2.1 <sup>abc</sup>  | 175.3 ± 3.2 <sup>abcd</sup> | 108.3 ± 4.0 <sup>ab</sup>  | 23.3 ± 0.6 <sup>ab</sup>  | 40.8 ± 8.1 <sup>a</sup>  | 3.2 ± 0.4 <sup>abcd</sup> | 6.1 ± 0.2 <sup>ab</sup>   |
| Pirsabaq-13 | 117.3 ± 0.6 <sup>ab</sup>   | 174.3 ± 2.5 <sup>abc</sup>  | 112.0 ± 3.0 <sup>ab</sup>  | 23.2 ± 0.7 <sup>ab</sup>  | 41.9 ± 3.2 <sup>a</sup>  | 3.0 ± 0.7 <sup>abc</sup>  | 5.7 ± 0.5 <sup>a</sup>    |
| Galaxy-13   | 118.0 ± 1.0 <sup>ab</sup>   | 173.3 ± 2.5 <sup>ab</sup>   | 109.0 ± 1.7 <sup>ab</sup>  | 22.4 ± 0.5 <sup>ab</sup>  | 38.7 ± 3.9 <sup>a</sup>  | 2.6 ± 0.2 <sup>a</sup>    | 5.8 ± 0.3 <sup>ab</sup>   |
| Sehar-06    | 115.7 ± 0.6 <sup>a</sup>    | 172.0 ± 2.6 <sup>ab</sup>   | 108.3 ± 2.5 <sup>ab</sup>  | 22.4 ± 0.5 <sup>ab</sup>  | 33.3 ± 8.4 <sup>a</sup>  | 2.7 ± 0.2 <sup>ab</sup>   | 6.3 ± 0.7 <sup>abc</sup>  |
| Shahkar-13  | 114.7 ± 0.6 <sup>a</sup>    | 171.0 ± 3.0 <sup>ab</sup>   | 105.7 ± 6.8 <sup>a</sup>   | 21.8 ± 1.1 <sup>ab</sup>  | 37.2 ± 13.7 <sup>a</sup> | 2.7 ± 0.2 <sup>ab</sup>   | 6.1 ± 0.7 <sup>ab</sup>   |
| Farid-06    | 114.7 ± 3.1 <sup>a</sup>    | 168.3 ± 2.9 <sup>a</sup>    | 111.7 ± 5.7 <sup>ab</sup>  | 21.1 ± 0.2 <sup>a</sup>   | 27.9 ± 11.1 <sup>a</sup> | 2.6 ± 0.3 <sup>ab</sup>   | 5.8 ± 0.7 <sup>ab</sup>   |
